# Supplementary material for: Novel c-Jun N-Terminal Kinase (JNK) Inhibitors with an 11H-Indeno[1,2-b]quinoxalin-11-one Scaffold
Source: MDPI journal article supplement (doi:10.3390/molecules26185688), 2021-09-20
Supplement: s1 [file s1]

## Supplementary Material

For

### **Novel c-Jun N-terminal Kinase (JNK) Inhibitors with an 11*H*-Indeno[1,2-*b*]quinoxalin-11-one Scaffold**

Serhii A. Liakhov<sup>1</sup>, Igor A. Schepetkin<sup>2</sup>, Olexander S. Karpenko<sup>1</sup>, Hanna I. Duma<sup>1</sup>, Nadiia M. Haidarzhy<sup>3</sup>, Liliya N. Kirpotina<sup>2</sup>, Anastasia R. Kovrizhina<sup>4</sup>, Andrei I. Khlebnikov<sup>4</sup>, Irina Yu. Bagryanskaya<sup>5</sup> and Mark T. Quinn<sup>2</sup>

<sup>1</sup>A.V. Bogatsky Physico-Chemical Institute, National Academy of Sciences of Ukraine, Odessa, Ukraine;

<sup>2</sup>Department of Microbiology and Cell Biology, Montana State University, Bozeman, MT 59717, USA;

<sup>3</sup> Odessa National Polytechnic University, Odessa, Ukraine;

<sup>4</sup>Kizhner Research Center, Tomsk Polytechnic University, Tomsk 634050, Russia;

<sup>5</sup>Vorozhtsov Institute of Organic Chemistry, Siberian Branch, Russian Academy of Sciences, Novosibirsk 630090, Russia

**Supplementary Table S1.** Bond lengths and angles of H-bonds for compound **3b** in the crystal<sup>a</sup>.

| H-bond       | D-H  | Distance (Å) |          | Angle <sup>a</sup> |
|--------------|------|--------------|----------|--------------------|
|              |      | H...A        | D...A    | D-H...A            |
| C9-H...N10   | 0.93 | 2.58         | 3.497(3) | 168                |
| C7'-H...O13  | 0.93 | 2.55         | 3.451(4) | 163                |
| C9'-H...N10' | 0.93 | 2.58         | 3.493(4) | 168                |

<sup>a</sup> Bond angles in degrees.

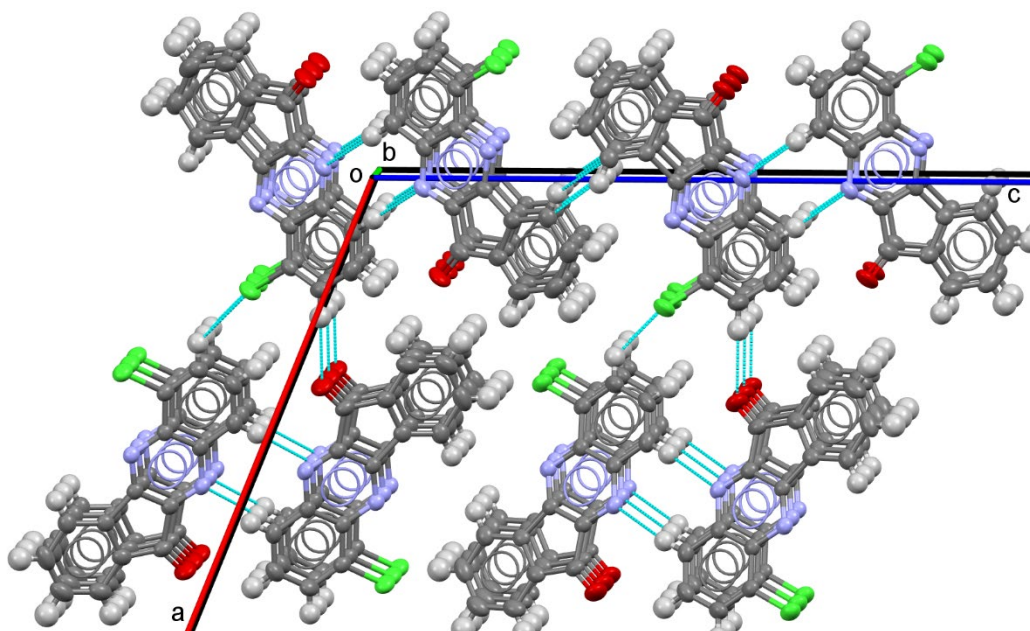

**Supplementary Figure S1.** Crystal packing of compound **3b** along crystallographic axis *b*. Oxygen and chlorine atoms are shown in red and green, respectively. Intermolecular H-bonds are shown as thin blue lines.

## NMR Spectra Data

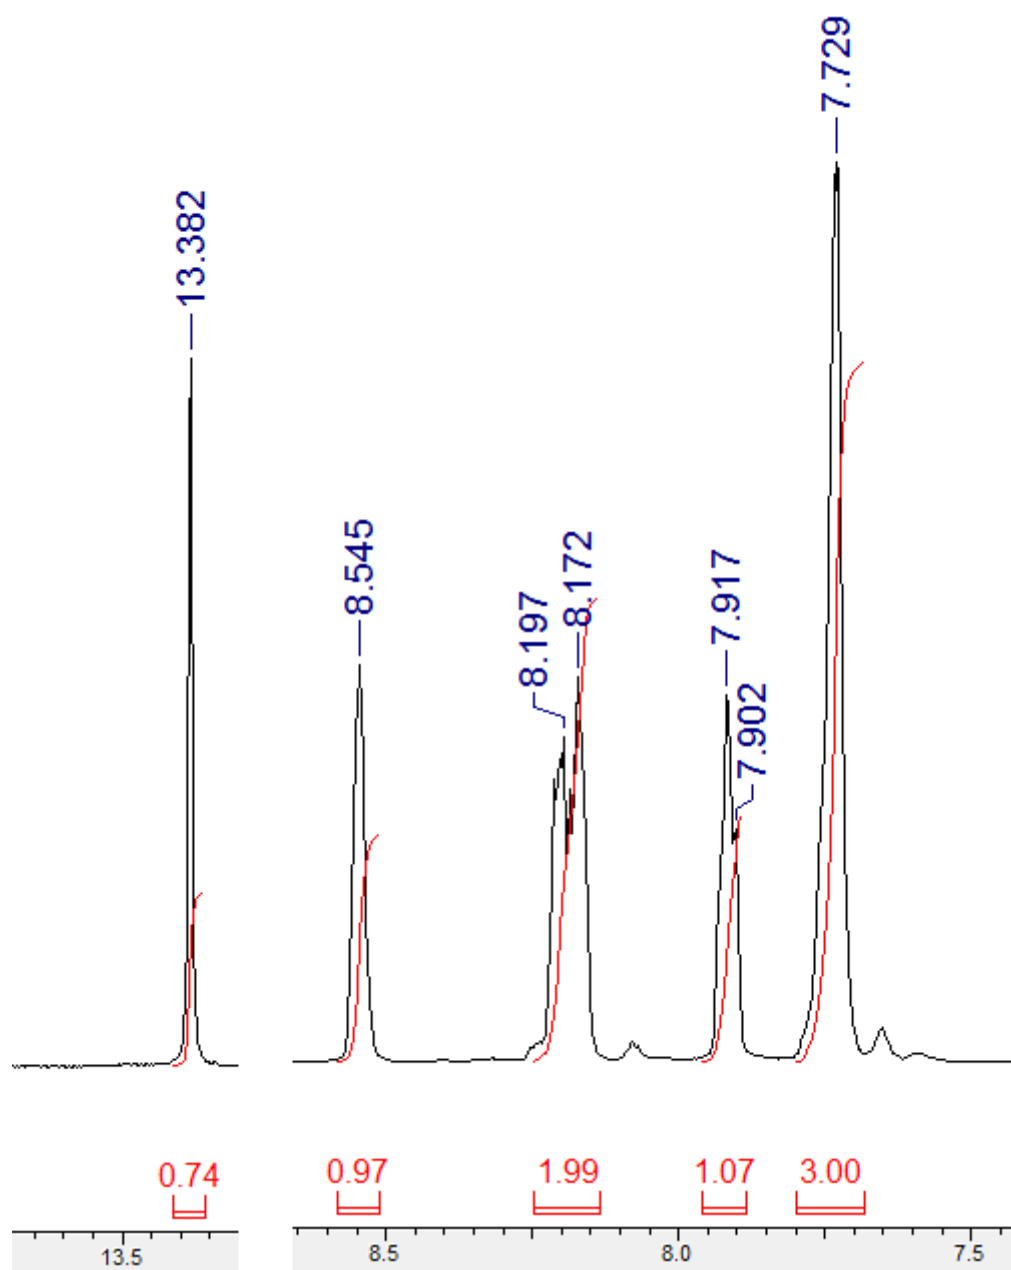

NMR  $^1\text{H}$  spectrum (600 MHz,  $\text{DMSO-}d_6$ ) of compound **4a**.

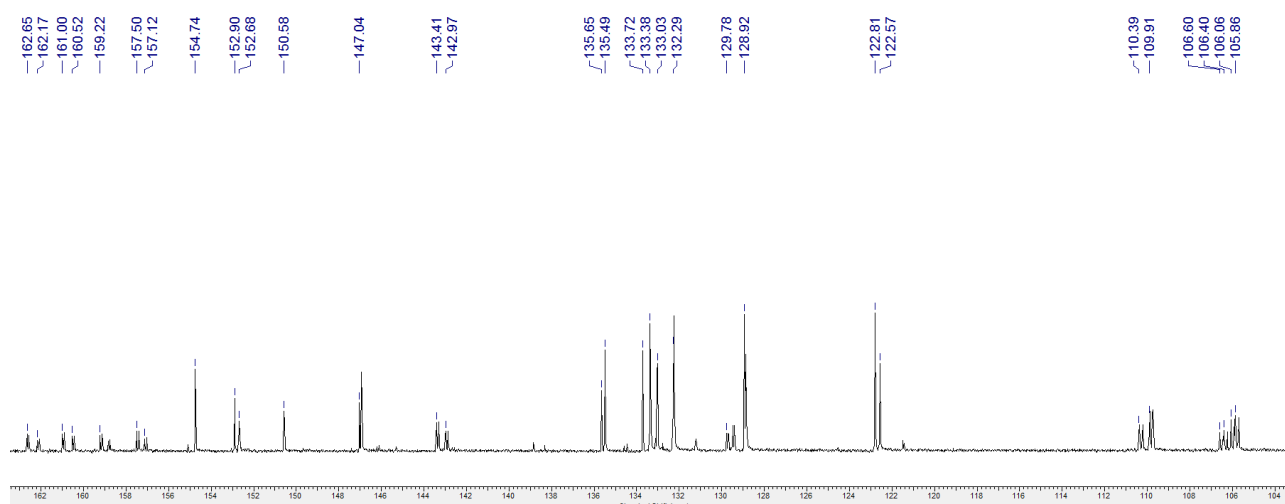

NMR <sup>13</sup>C spectrum (150 MHz, DMSO-D<sub>6</sub>) of compound **4a**.

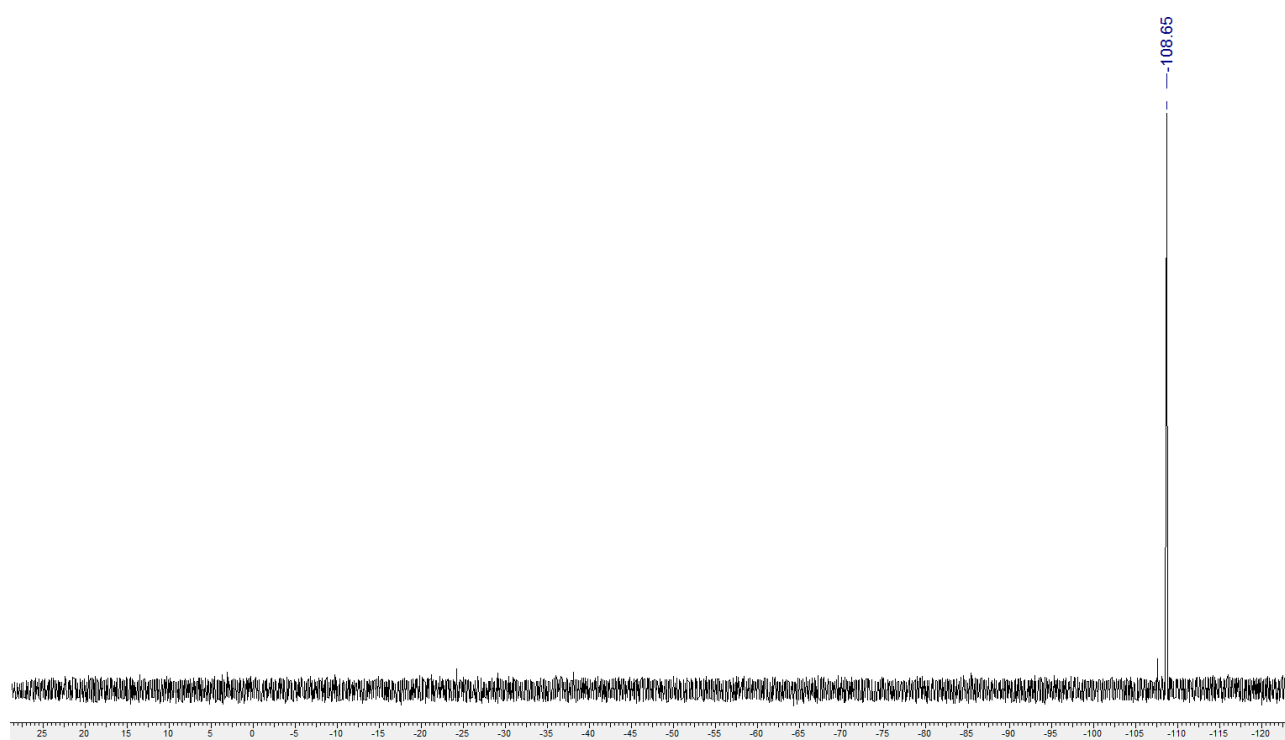

NMR <sup>19</sup>F spectrum (280 MHz, DMSO-D<sub>6</sub>) of compound **4a**.

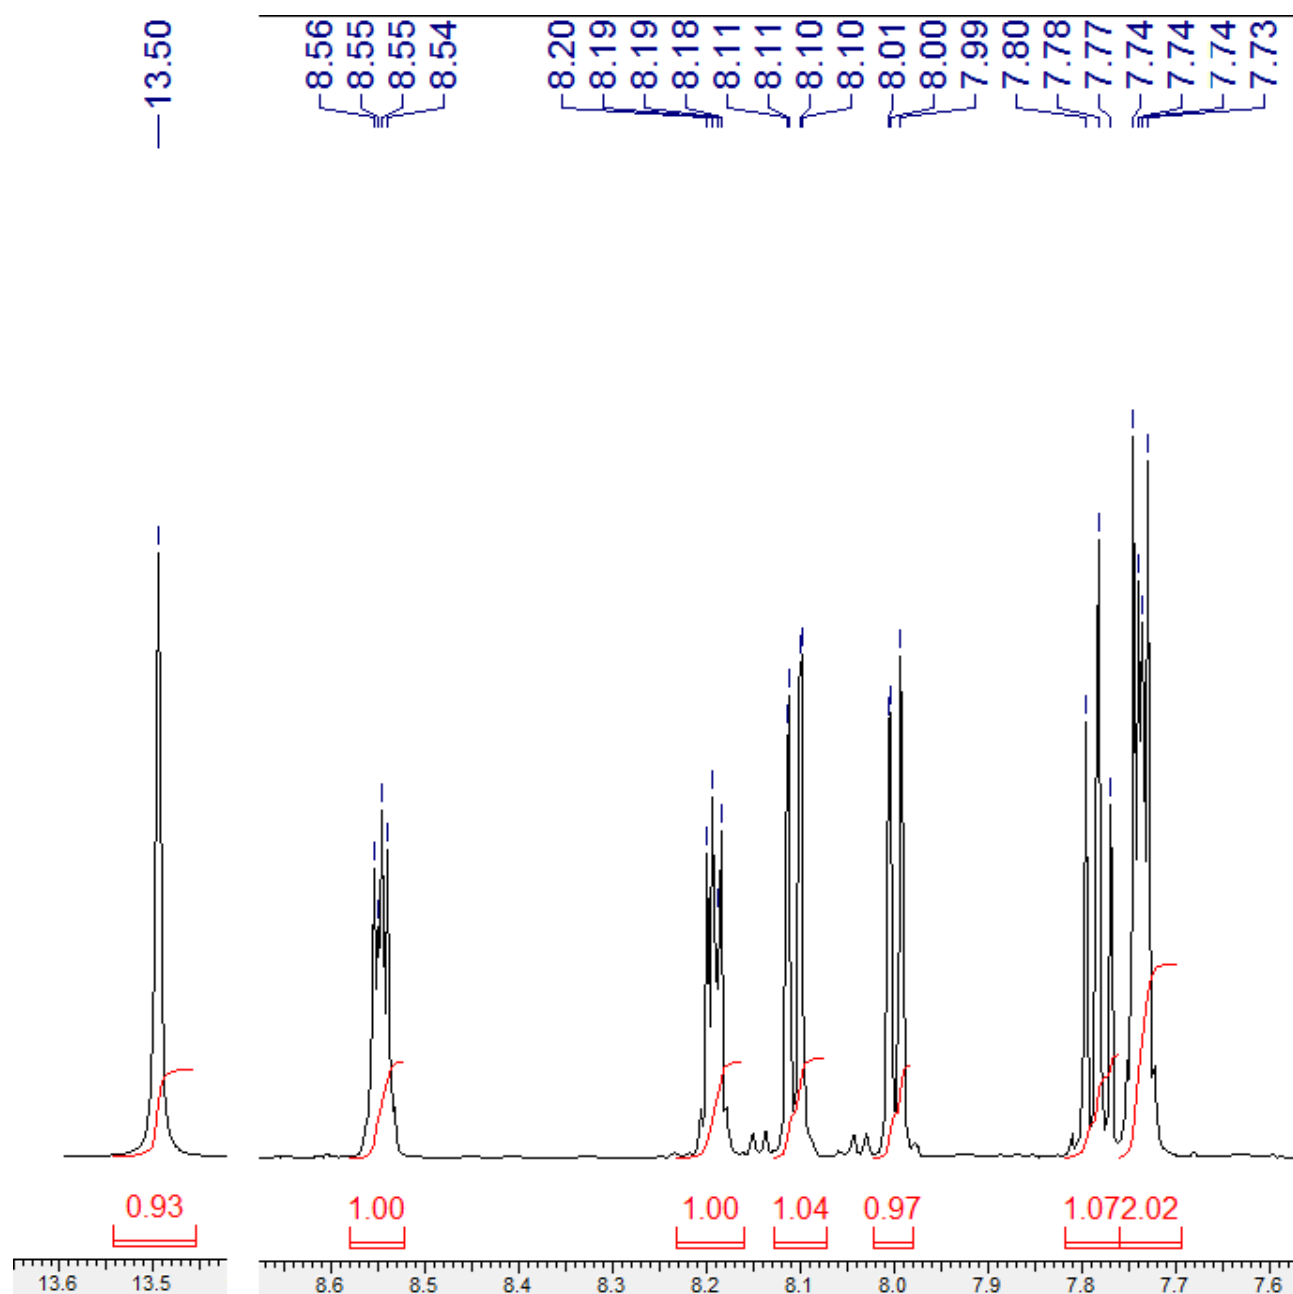

NMR  $^1\text{H}$  spectrum (600 MHz, DMSO- $\text{D}_6$ ) of compound **4b**.

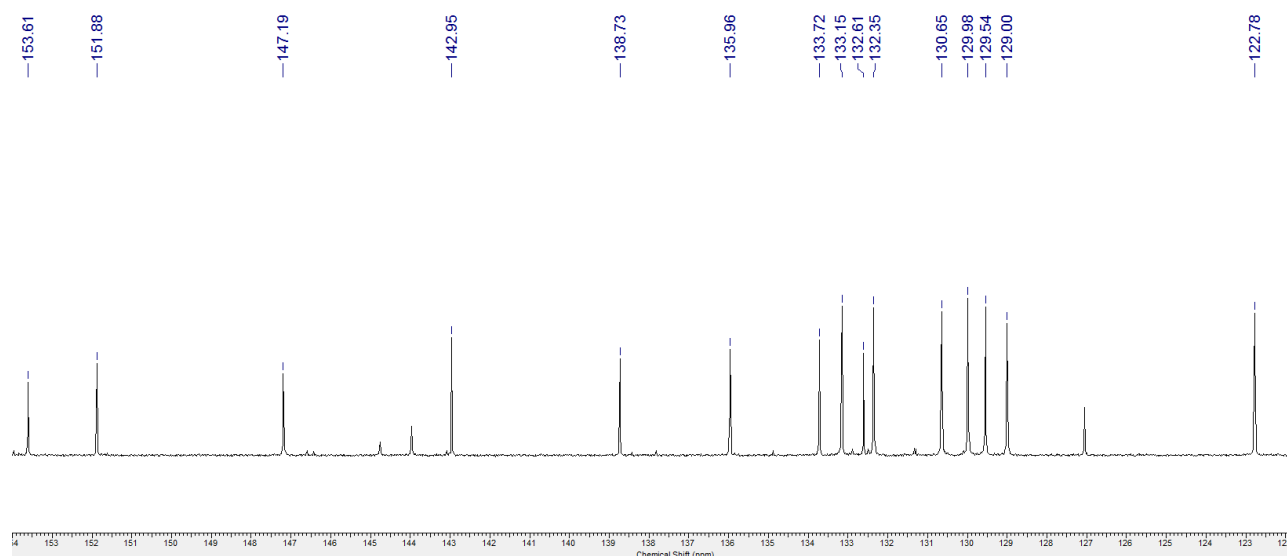

NMR <sup>13</sup>C spectrum (150 MHz, DMSO-D6) of compound **4b**.

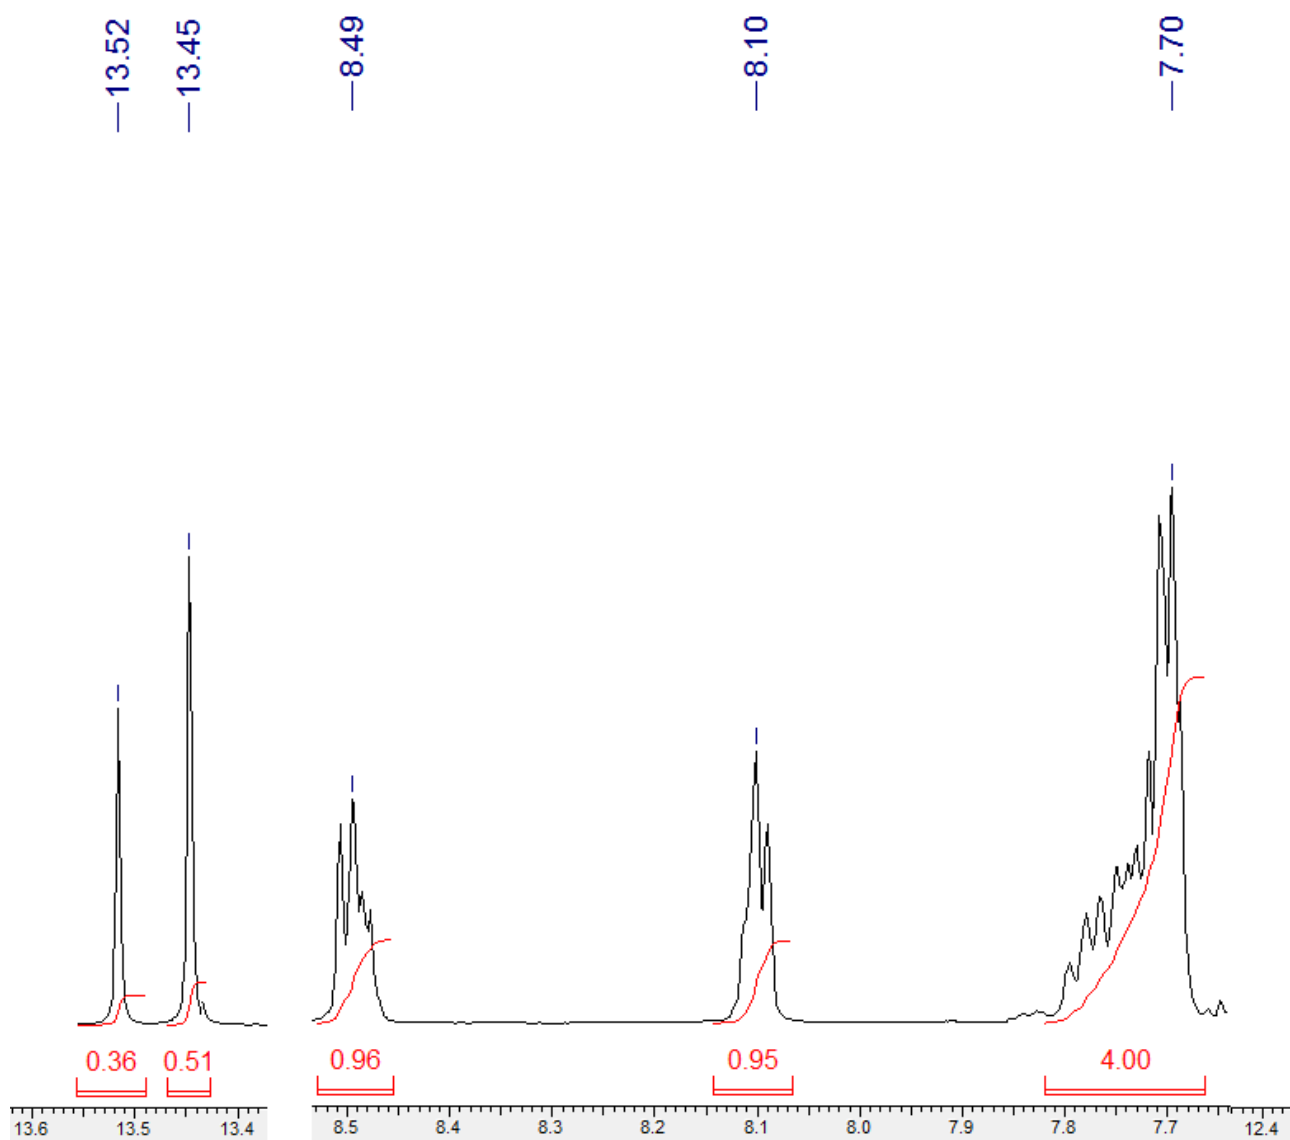

NMR  $^1\text{H}$  spectrum (600 MHz, DMSO-D<sub>6</sub>) of compound **4e**.

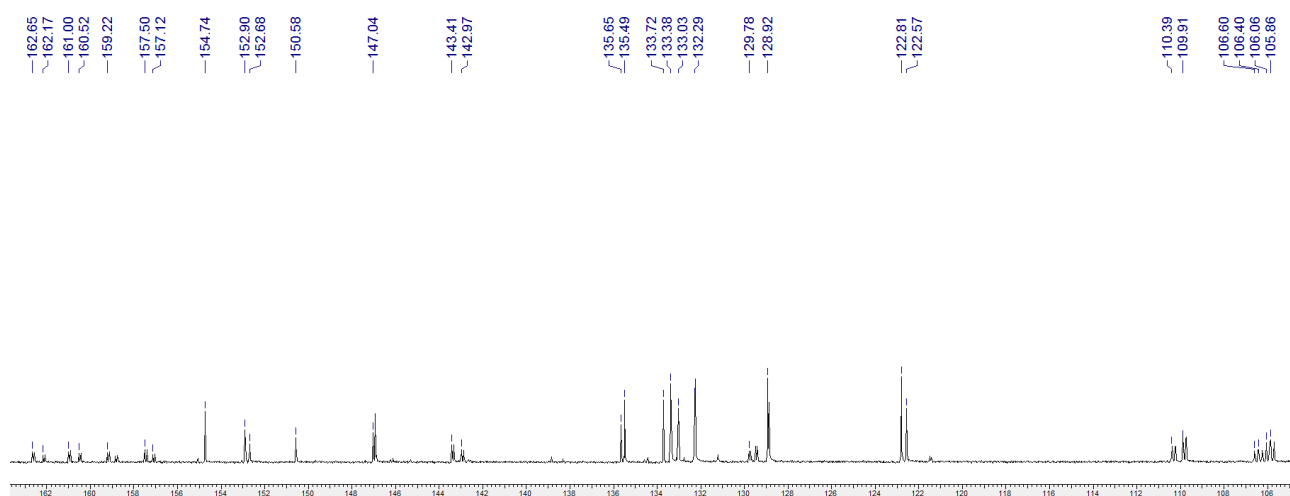

NMR  $^{13}\text{C}$  spectrum (150 MHz, DMSO-D<sub>6</sub>) of compound **4e**.

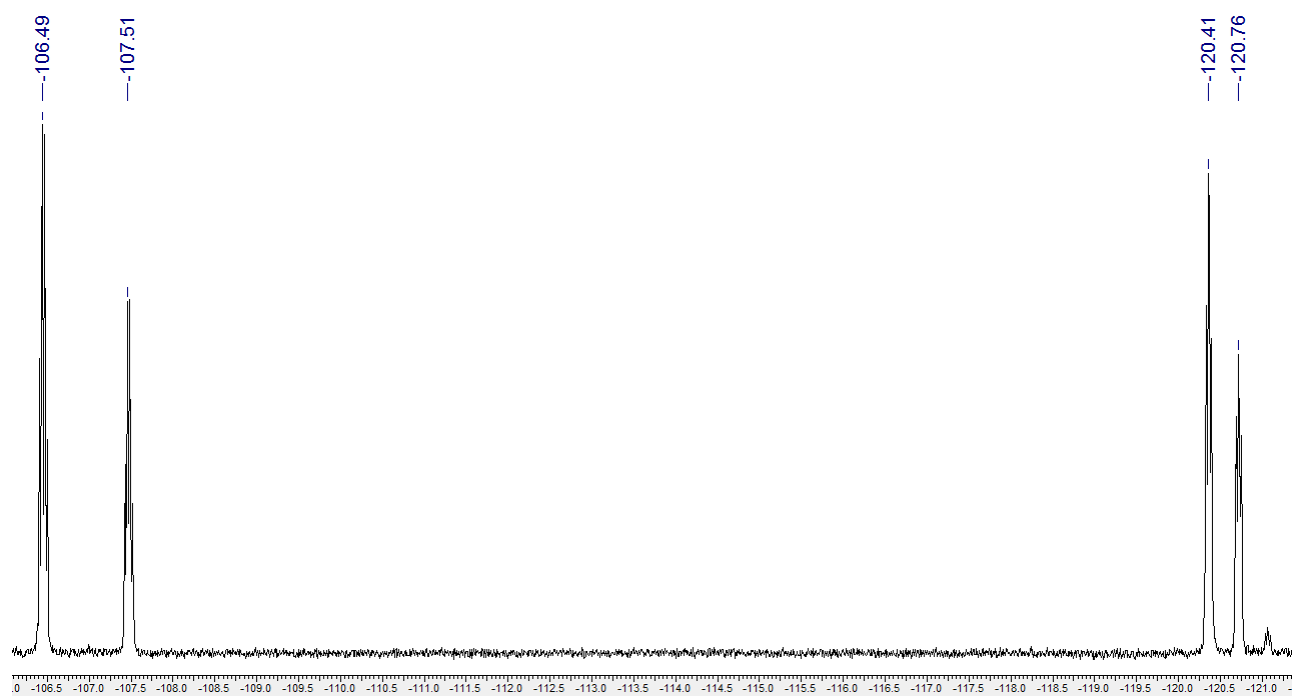

NMR  $^{19}\text{F}$  spectrum (280 MHz, DMSO- $\text{D}_6$ ) of compound **4e**.



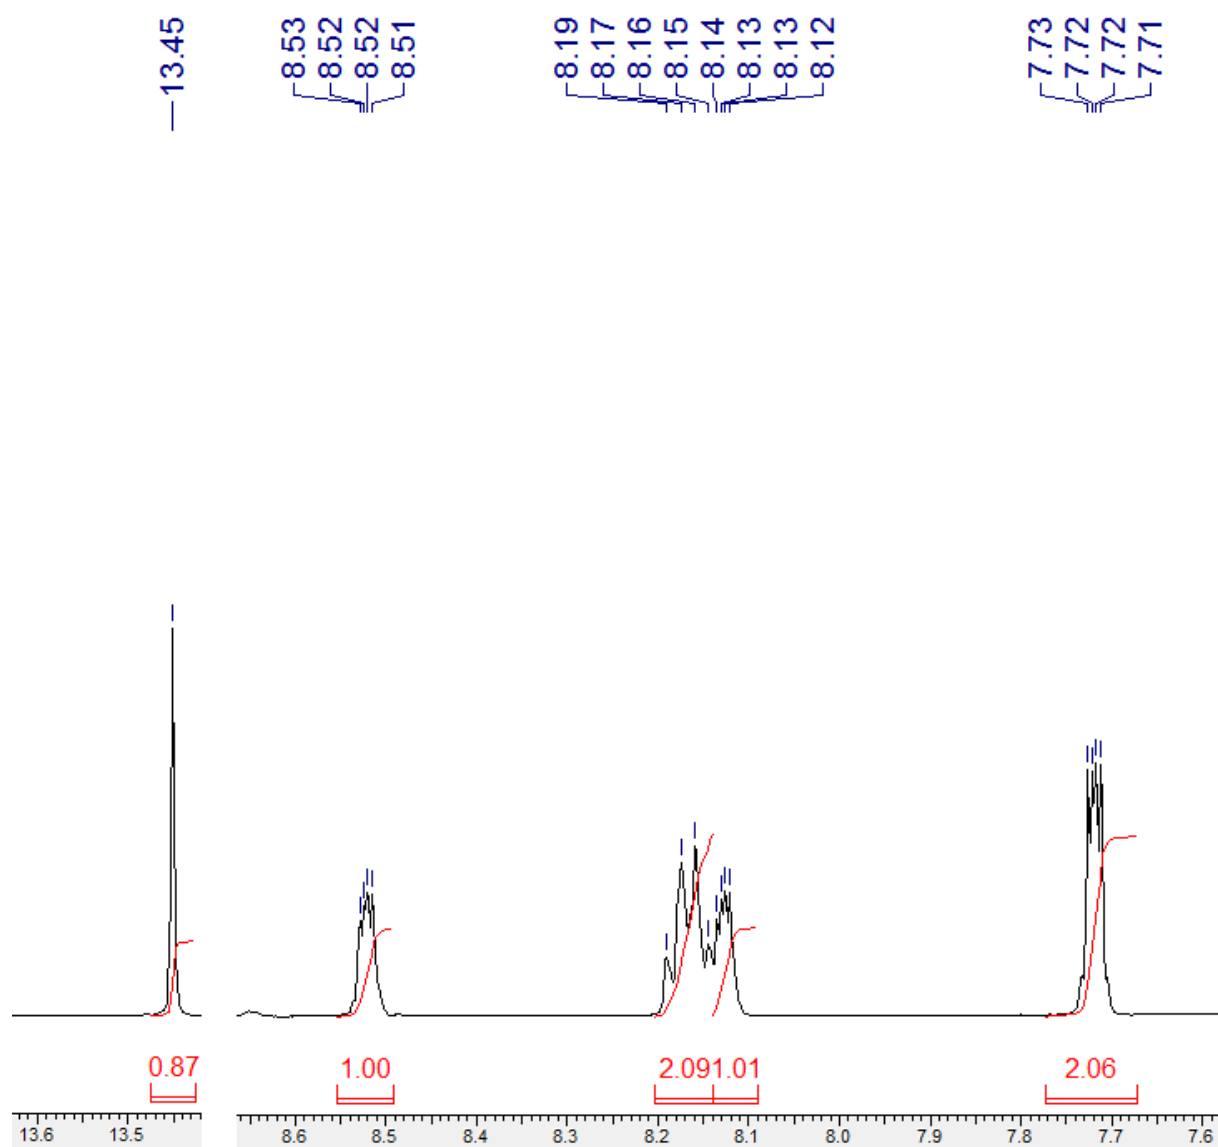

NMR <sup>1</sup>H spectrum (600 MHz, DMSO-D<sub>6</sub>) of compound **4f**.

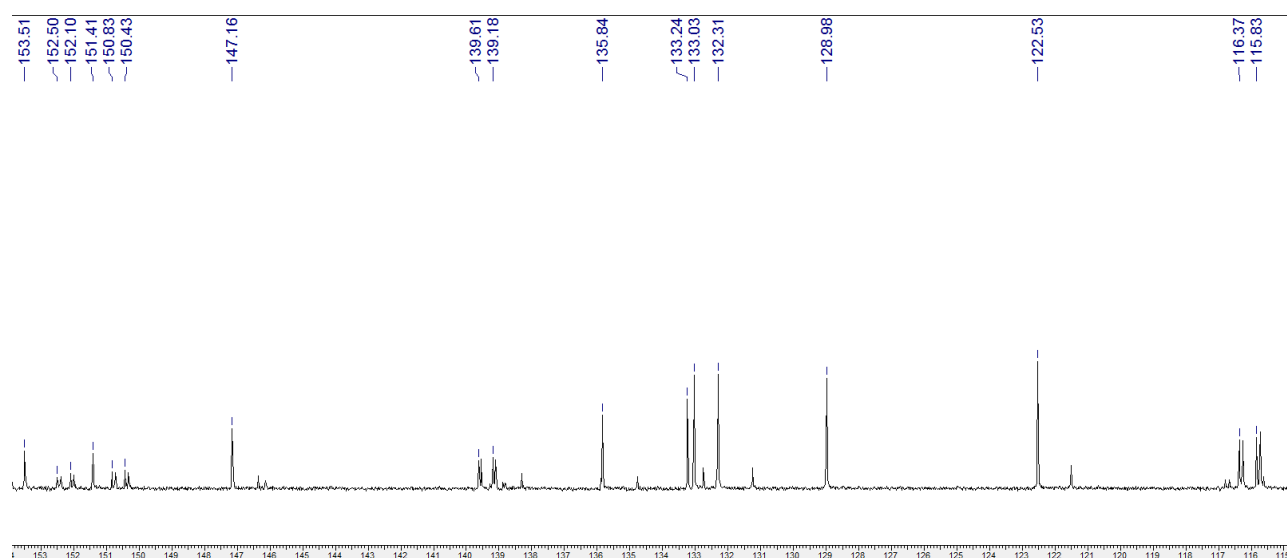

NMR <sup>13</sup>C spectrum (150 MHz, DMSO-D<sub>6</sub>) of compound **4f**.

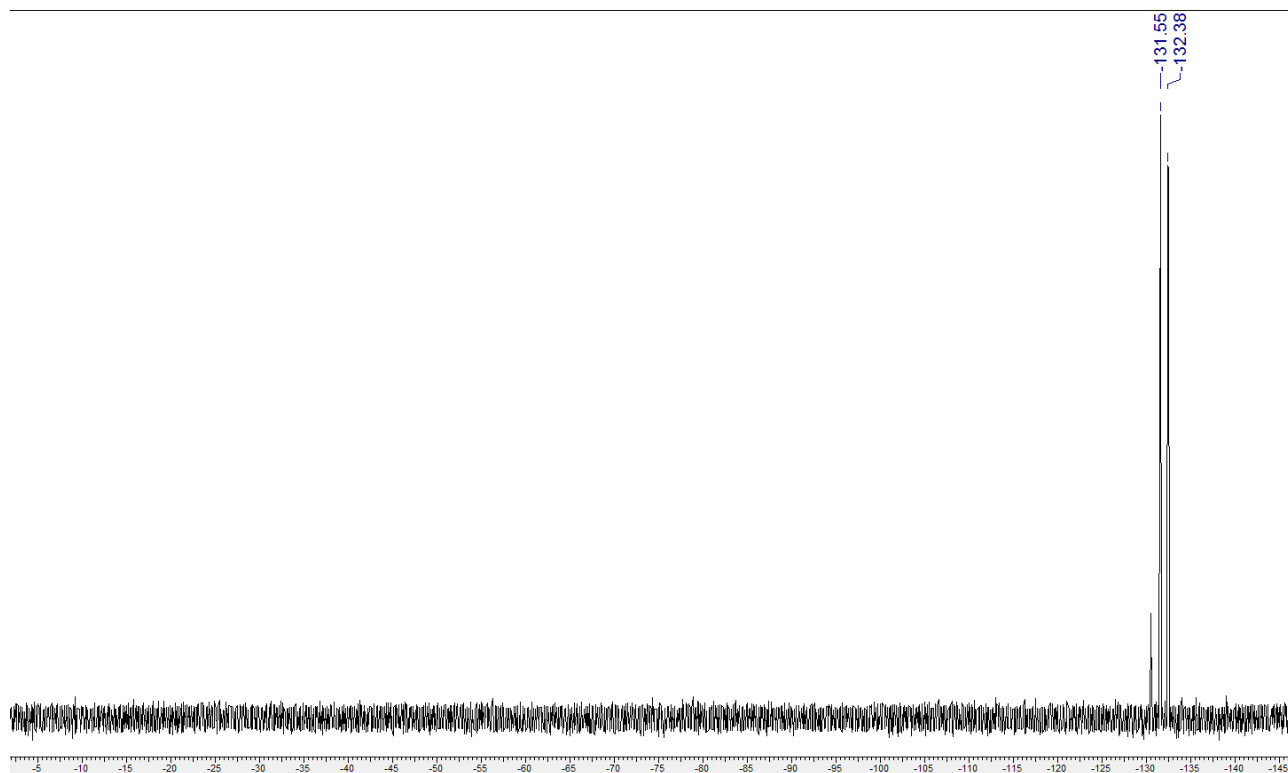

NMR  $^{19}\text{F}$  spectrum (280 MHz, DMSO- $\text{D}_6$ ) of compound **4f**.

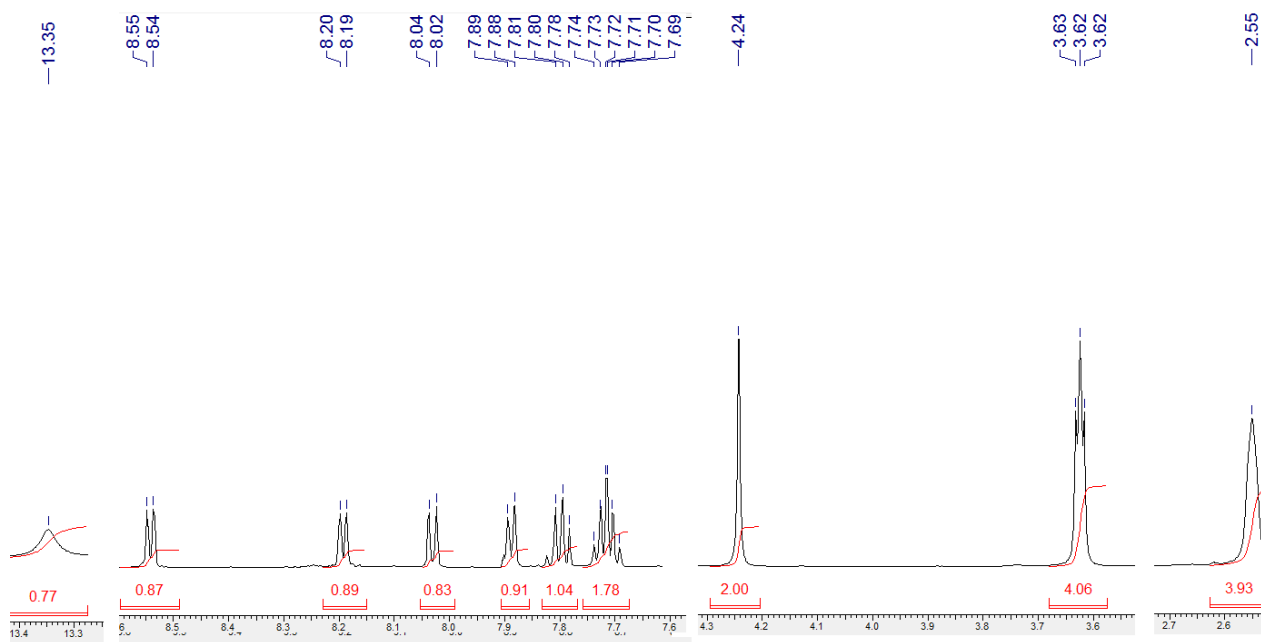

NMR  $^1\text{H}$  spectrum (600 MHz, DMSO- $\text{D}_6$ ) of compound **4m**.

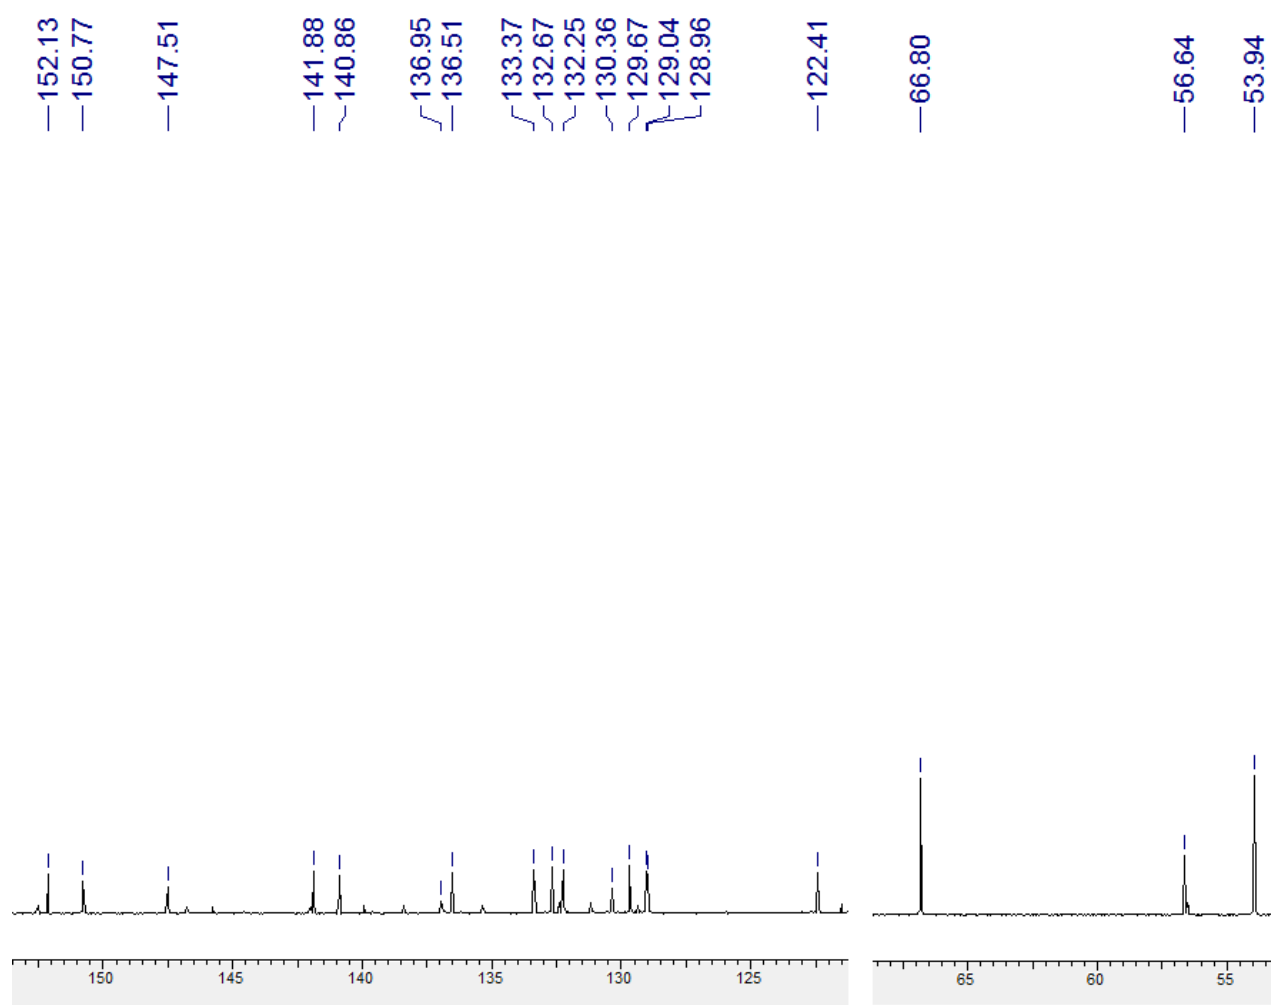

NMR  $^{13}\text{C}$  spectrum (150 MHz,  $\text{DMSO-}d_6$ ) of compound **4m**.
